# Supplementary material for: Health-promoting work schedules: protocol for a large-scale cluster randomised controlled trial on the effects of a work schedule without quick returns on sickness absence among healthcare workers
Source: HighWire-hosted journal article supplement (doi:10.1136/bmjopen-2021-058309), 2022-04-01
Supplement: bmjopen-2021-058309supp002_data_supplement.pdf [file bmjopen-2021-058309supp002_data_supplement.pdf]

Supplementary file 2

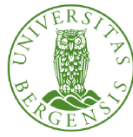

INFORMASJONSSKRIV – versjon 20.12.2020

## REQUEST FOR PARTICIPATION IN QUESTIONNAIRE

This is a request if you want to participate in the project on the effect of a shift schedule without quick returns - a randomized controlled trial among health workers who work shifts at Haukeland University Hospital. The main purpose of the survey is to test whether a shift schedule without quick return will reduce sickness absence among health personnel. In addition, it will be investigated whether such shifts lead to changes in sleep and functioning, including physical and mental health, work-related accidents and turnover intention. The study is conducted by researchers at the University of Bergen, the National Institute of Public Health and Haukeland University Hospital.

## WHAT DOES THE PROJECT INVOLVE?

Participation means that you keep a diary of your sleep and that you register your sleep with a sleep radar for 14 days, on two occasions. The first time is now, and then you will receive a sleep diary and sleep radar again in 6 months. The Sleep Diary contains 10 questions that you must answer every day upon awaking from a sleep period, for 14 days. The questions are about when you went to bed, how long it took you to fall asleep, and other questions related to your sleep and how you felt during the day. The sleep radar should be installed on your bedside table (or another table in the bedroom) and point towards your bed. It will collect information about your movement during the night using radar technology. Based on this, we can say something objective about how you sleep.

The data collected will be linked to your answers to the questionnaire you received in minGAT and information about shifts (quick returns) and sick leave retrieved from the payroll register 12 months before and 12 months after the intervention. Data from the payroll register contains information about your work plan and about your sick leave.

## POSSIBLE BENEFITS AND DISADVANTAGES

**POSSIBLE BENEFITS:** Some may find it educational and interesting to participate. By participating, you also get to contribute to research and to identify more health-promoting work schedules. You will get feedback on the results by through short articles published on “Innsiden”. The results can contribute to uncovering problematic conditions in healthcare workers' working conditions / situation.

**POSSIBLE DISADVANTAGES:** A possible disadvantage of participation may be that some may trigger some negative emotions if they have a problematic relationship with the topics we ask about.

## VOLUNTARY PARTICIPATION AND OPPORTUNITY TO WITHDRAW YOUR CONSENT

It is voluntary to participate. As long as you can be identified in the data material, you have the right to: Access what personal information is registered about you, to have personal information about you corrected, to have personal information about you deleted, to receive a copy of your personal information, and to send a complaint to the Data Inspectorate about the processing of your personal data. In such cases, you can contact project manager Anette Harris (+47 55 58 32 19, anette.harris@uib.no). You can also contact the privacy ombudsman in Helse Bergen if you have questions about the health trust's processing of your personal information.

The legal basis for processing your personal data in the project is that the processing is necessary to perform a task in the public interest, and for quality improvement purposes (GDPR art. 6 (1) e) and art. 9 (2) i), and on the basis of your consent to voluntary participation in the project.

## WHAT HAPPENS TO YOUR INFORMATION?

In this project, there are two types of information that are kept separate: 1) Data file with personally identifiable information (such as name, social security number and unique ID number) and 2) data file with the actual answers

## Supplementary file 2

## INFORMASJONSSKRIV – versjon 20.12.2020

given and your unique ID number. The latter data is used for statistical analyzes. Only the researchers in the project have access to these files. Data file with personally identifiable information and data file with your answers are stored separately on a secure server at UiB. All the researchers involved in the project have a statutory duty of confidentiality. When the project period is over, the file with all the personally identifiable information is deleted for good (no later than 01 January 2031). The answers you have given will then be deidentified.

**APPROVAL**

The Regional Committee for Medical and Health Research Ethics has made a research ethics assessment and approval of the project (2020/200386). The University of Bergen and project manager Anette Harris are responsible for the privacy of the project. An assessment of privacy conventions (DPIA) has been carried out in collaboration with the privacy ombudsman in Helse Bergen and at UiB.

**CONTACT INFORMATION**

If you have questions about the project, you can contact project manager Anette Harris (phone: 55 58 32 19; e-mail: anette.harris@uib.no) or work package manager Øystein Vedaa (phone: 21 07 88 34; email: oystein.vedaa@fhi.no). You can also contact us if you experience difficult feelings due to participating in the survey. You can contact the University of Bergen's privacy representative if you have questions about the processing of your personal information in the project (Janecke Helene Veim, telephone: 55 58 20 29, email: janecke.veim@uib.no).

**DO YOU WANT TO PARTICIPATE IN THIS RESEARCH PROJECT?**

If you tick the box below, you give your consent to participate in this research project, and that data collected can be linked to information about your work schedule and sick leave retrieved from the payroll register, as described in this document. Tick the box below to give your consent:

**I agree to participate in the research project and that data can be linked to my information from the payroll register**
